# Supplementary material
Source: publisher figshare collection journal article supplement (https://acs.figshare.com/ndownloader/files/4161757)
Supplement: Supplementary file 1 [file 4161757]

## Supporting Information

### **Oxidation of an organic adlayer - a bird's eye view**

*Thomas Waldmann<sup>1</sup>, Daniela Künzel<sup>2</sup>, Harry E. Hoster<sup>1\*</sup>, Axel Groß<sup>2</sup>,*

*R. Jürgen Behm<sup>1</sup>*

<sup>1</sup> Institute of Surface Chemistry and Catalysis, Ulm University, 89069 Ulm, Fax: +49

(0)731/50-25452, juergen.behm@uni-ulm.de

<sup>2</sup> Institute of Theoretical Chemistry, Ulm University, 89069 Ulm, Fax: +49 (0)731/50-22819,

axel.gross@uni-ulm.de

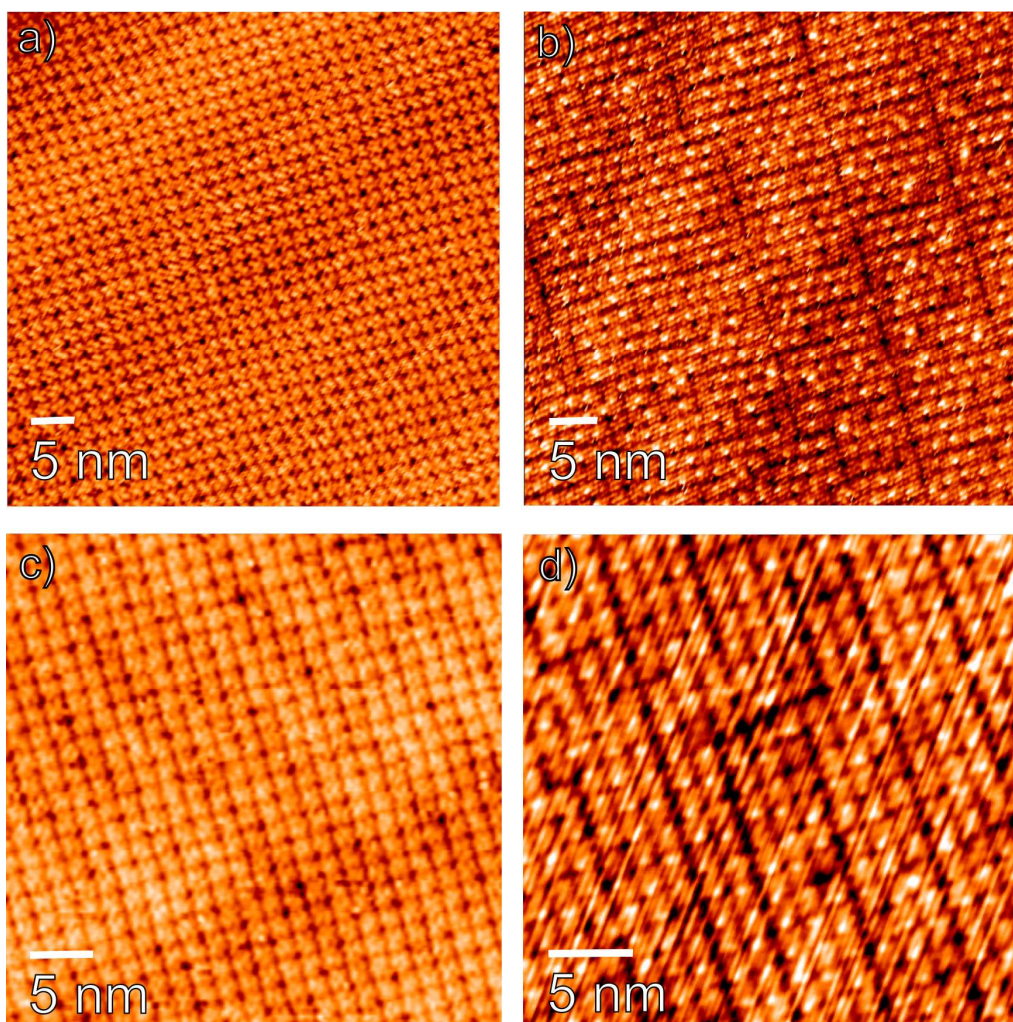

**Figure S1** Large scale STM images

- a)  $\alpha$ - phase on Ag(111) ( $48 \times 48 \text{ nm}^2$ ,  $154 \text{ s frame}^{-1}$ ,  $I_T = 60 \text{ pA}$ ,  $U_T = -2.29 \text{ V}$ )
- b)  $\alpha'$ -phase on Ag(111) ( $45 \times 45 \text{ nm}^2$ ,  $176 \text{ s frame}^{-1}$ ,  $I_T = 70 \text{ pA}$ ,  $U_T = -1.96 \text{ V}$ )
- c)  $\alpha$ -phase on Ag films ( $36 \times 36 \text{ nm}^2$ ,  $100 \text{ s frame}^{-1}$ ,  $I_T = 5 \text{ pA}$ ,  $U_T = -2.20 \text{ V}$ )
- d)  $\alpha'$ -phase on Ag films ( $28 \times 28 \text{ nm}^2$ ,  $100 \text{ s frame}^{-1}$ ,  $I_T = 15.8 \text{ pA}$ ,  $U_T = -2.25 \text{ V}$ ).

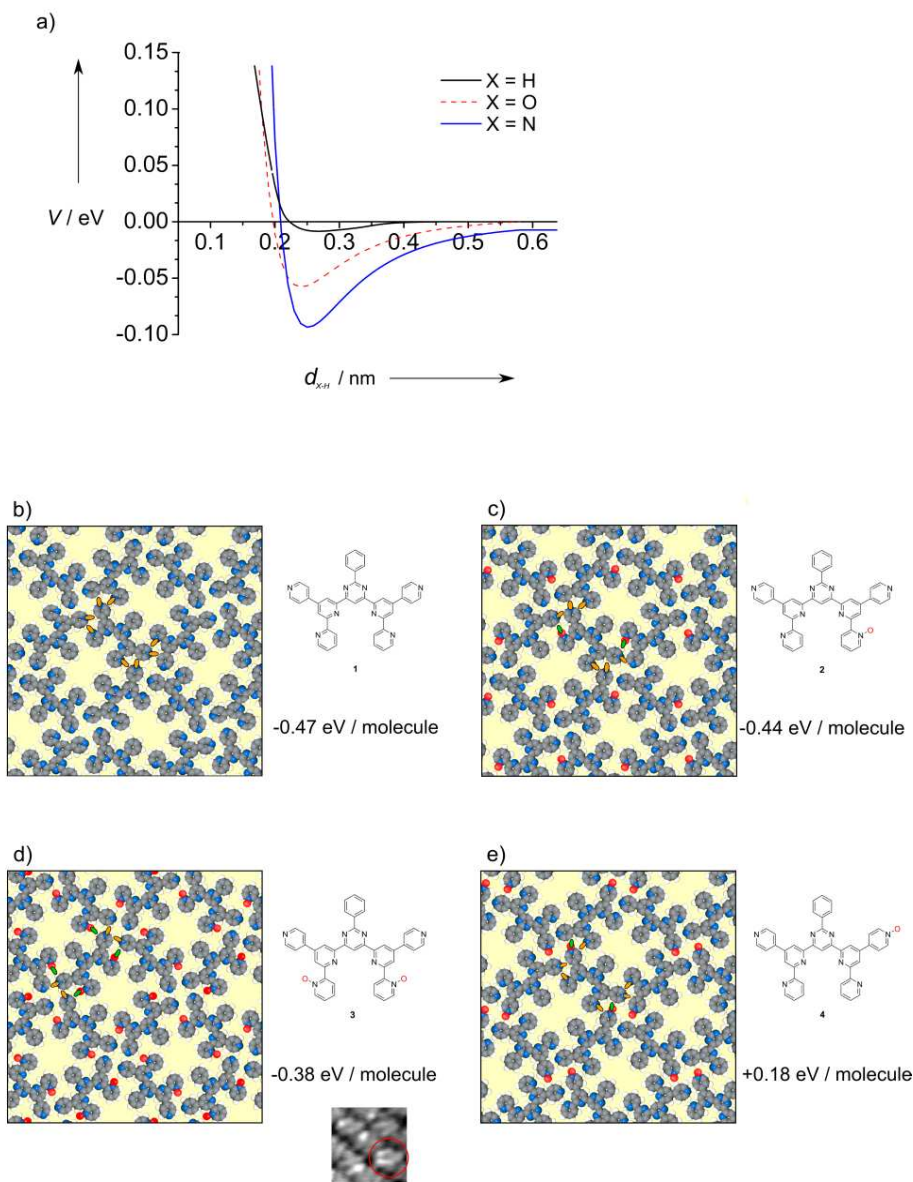

**Figure S2**

a) MP2 (6-31G(d,p)) based  $O\cdots H$  (calculated in this work),  $N\cdots H-C^{15}$  and  $C-H\cdots H-C^{15}$  potentials used in the MC based structure relaxations. (b) - (e): Relaxed structures of the periodic MC based calculations. Hydrogen bonds are marked for one molecule per structure (C: grey, N: blue, O: red,  $N\cdots H$  bonds: orange,  $N-O\cdots H$  bonds: green). b)  $\alpha$ -phase (model for the structure in Figure 1a). c) Network of **2** (model for the structure in Figure 1b). d) Network of **3** (rarely observed). The inset shows an STM image of one **3** molecule ( $4.5 \times 4.5 \text{ nm}^2$ ,  $1 \text{ frame s}^{-1}$ ,  $I_T = 50.1 \text{ pA}$ ,  $U_T = -1.75 \text{ V}$ ). e) Network of **4** (not

observed).

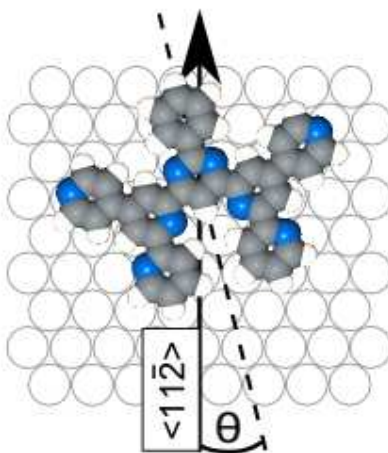

**Figure S3**

Definition of the azimuth angle  $\theta$  of **1** with respect to the  $\langle 11\bar{2} \rangle$  direction of Ag(111) and Au(111).
